# Supplementary material
Source: MDPI journal article supplement (https://www.mdpi.com/2409-515X/3/4/33)
Supplement: s1 [file s1]

## Sheet: Group A
Infant	date of first screen	1st TEOAE right	1st TEOAE left	Date of 2nd screen	2nd TEOAE right	2nd TEOAE left	Follow up plan	notes								Third screenig
1	2017-02-13	clear response	incomplete	2017-03-14	not retested	pass	discharge
2	2017-03-10	clear response	no clear response	2017-03-16	not retested	pass	discharge
3	2017-02-17	incomplete	incomplete	2017-02-18	pass	pass	discharge
4	2017-03-02	incomplete	incomplete	2017-03-09	pass	pass	discharge
5	2017-01-12	incomplete	incomplete	2017-03-09	pass	pass	discharge
6	2017-03-29	incomplete	not tested	2017-03-30	pass	pass	discharge
7	2017-02-03	clear response	clear response				discharge
8	2017-03-20	clear response	no clear response	2017-03-28	pass	pass	discharge
9	2017-03-21	clear response	no clear response	2017-04-20	pass	pass	discharge
10	2017-01-13	clear response	no clear response	2017-03-07	pass	pass	discharge
11	2017-01-20	clear response	no clear response		pass	pass	discharge
12	2017-02-27	pass	no clear response	2017-03-06	pass	pass	discharge
13	2017-03-02	no clear response	clear response	2017-03-09	pass	pass	discharge
14	2017-02-21	no clear response	clear response	2017-03-20	pass	pass	discharge
15	2017-03-10	no clear response	clear response	2017-03-28	pass	pass	discharge
16	2017-02-20	no clear response	clear response	2017-02-28	pass	pass	discharge
17	2017-02-20	no clear response	clear response	2017-02-28	pass	pass	discharge
18	2017-03-01	no clear response	no clear response	2017-03-02	pass	pass	discharge
19	2017-03-29	no clear response	no clear response	2017-04-04	pass	pass	discharge
20	2017-02-02	no clear response	clear response	2017-03-06	pass	pass	discharge
21	2017-02-06	no clear response	clear response	2017-03-06	pass	pass	discharge
22	2017-01-09	no clear response	no clear response	2017-01-24	pass	pass	discharge
23	2017-02-07	no clear response	no clear response	2017-02-15	pass	pass	discharge
24	2017-01-12	no clear response	no clear response	2017-03-23	pass	pass	discharge
25	2017-03-22	no clear response	no clear response	2017-03-23	refer	refer	declined ABR
26	2017-02-15	not tested	no tested				declined screen
27	2017-01-12	clear response	incomplete	2017-03-03	incomplete	incomplete	referred for further testing
28	2017-02-27	clear response	clear response				discharge
29	2017-03-26	clear response	clear response				discharge
30	2017-02-20	clear response	clear response				discharge
31	2017-02-20	clear response	clear response				discharge
32	2017-02-21	clear response	clear response				discharge
33	2017-02-07	clear response	clear response				discharge
34	2017-01-12	clear response	clear response				discharge
35	2017-03-24	clear response	clear response				discharge
36	2017-02-02	clear response	clear response				discharge
37	2017-01-26	clear response	clear response				discharge
38	2017-03-21	clear response	clear response				discharge
39	2017-02-22	clear response	clear response				discharge
40	2017-02-02	clear response	clear response				discharge
41	2017-03-24	clear response	clear response				discharge
42	2017-02-08	clear response	clear response				discharge
43	2017-01-11	clear response	clear response				discharge
44	2017-03-27	clear response	clear response				discharge
45	2017-02-07	clear response	clear response				discharge
46	2017-03-31	clear response	clear response				discharge
47	2017-03-13	clear response	clear response				discharge
48	2017-01-23	clear response	clear response				discharge
49	2017-03-13	clear response	clear response				discharge
50	2017-02-27	clear response	clear response				discharge
51	2017-03-15	clear response	clear response				discharge
52	2017-03-06	clear response	clear response				discharge
53	2017-03-22	clear response	clear response				discharge
54	2017-01-06	clear response	clear response				discharge
55	2017-01-30	clear response	clear response				discharge
56	2017-02-20	clear response	clear response				discharge
57	2017-03-31	clear response	clear response				discharge
58	2017-01-24	clear response	clear response				discharge
59	2017-01-11	clear response	clear response				discharge
60	2017-01-17	clear response	clear response				discharge
61	2017-01-19	clear response	clear response				discharge
62	2017-03-06	clear response	no clear response				lost to follow up	no phone number
63	2017-02-08	clear response	no clear response				lost to follow up	unable to contact
64	2017-03-20	clear response	no clear response				lost to follow up	unable to contact
65	2017-02-08	no clear response	clear response				lost to follow up	unable to contact

## Sheet: Group B
infant	DATE OF 1ST SCREEN	1st TEOAE RIGHT	1st TEOAE LEFT	DATE OF 2ND SCREEN	2nd TEOAE RIGHT	2nd TEOAE LEFT	Follow up plan	notes
1	2017-01-09	no clear response	clear response	2017-02-09	clear response	clear response	discharge
2	2017-04-06	no clear response	clear response	2017-04-24	clear response	clear response	discharge
3	2017-01-05	no clear response	no clear response	2017-03-06	clear response	clear response	discharge
4	2017-04-06	no clear response	no clear response	2017-04-10	clear response	clear response	discharge
5	2017-01-05	clear response	no clear response		not retested	clear response	discharge
6	2017-01-05	no clear response	no clear response	2017-03-06	no clear response	no clear response	diagnostic testing	probable bilateral middle ear effusion
7	2017-01-05	no clear response	no clear response	2017-01-09	no clear response	no clear response	diagnostic testing	probable bilateral middle ear effusion
8	2017-03-27	incomplete	incomplete				lost to follow up	unable to contact
9	2016-12-22	clear response	clear response				discharge
10	2016-12-22	clear response	clear response				discharge
11	2016-12-22	clear response	clear response				discharge
12	2017-01-05	clear response	clear response				discharge
13	2017-01-05	clear response	clear response				discharge
14	2017-01-05	clear response	clear response				discharge
15	2017-01-05	clear response	clear response				discharge
16	2017-01-05	clear response	clear response				discharge
17	2017-01-05	clear response	clear response				discharge
18	2017-01-05	clear response	clear response				discharge
19	2017-01-05	clear response	clear response				discharge
20	2017-01-05	clear response	clear response				discharge
21	2017-01-05	clear response	clear response				discharge
22	2017-01-05	clear response	clear response				discharge
23	2017-01-05	clear response	clear response				discharge
24	2017-01-05	clear response	clear response				discharge
25	2017-01-05	clear response	clear response				discharge
26	2017-01-05	clear response	clear response				discharge
27	2017-01-05	clear response	clear response				discharge
28	2017-01-05	clear response	clear response				discharge
29	2017-01-05	clear response	clear response				discharge
30	2017-01-05	clear response	clear response				discharge
31	2017-01-05	clear response	clear response				discharge
32	2017-01-05	clear response	clear response				discharge
33	2017-01-09	clear response	clear response				discharge
34	2017-01-09	clear response	clear response				discharge
35	2017-01-09	clear response	clear response				discharge
36	2017-01-19	clear response	clear response				discharge
37	2017-01-23	clear response	clear response				discharge
38	2017-01-24	clear response	clear response				discharge
39	2017-01-26	clear response	clear response				discharge
40	2017-01-31	clear response	clear response				discharge
41	2017-02-01	clear response	clear response				discharge
42	2017-02-06	clear response	clear response				discharge
43	2017-02-09	clear response	clear response				discharge
44	2017-02-09	clear response	clear response				discharge
45	2017-02-09	clear response	clear response				discharge
46	2017-02-09	clear response	clear response				discharge
47	2017-02-09	clear response	clear response				discharge
48	2017-02-09	clear response	clear response				discharge
49	2017-02-09	clear response	clear response				discharge
50	2017-02-13	clear response	clear response				discharge
51	2017-02-13	clear response	clear response				discharge
52	2017-03-06	clear response	clear response				discharge
53	2017-03-07	clear response	clear response				discharge
54	2017-03-09	clear response	clear response				discharge
55	2017-03-30	clear response	clear response				discharge
56	2017-04-03	clear response	clear response				discharge
57	2017-04-03	clear response	clear response				discharge
58	2017-04-03	clear response	clear response				discharge
59	2017-04-06	clear response	clear response				discharge
60	2017-04-06	clear response	clear response				discharge
61	2017-04-06	clear response	clear response				discharge
62	2017-04-06	clear response	clear response				discharge
63	2017-01-05	clear response	no clear response				lost to follow up	no phone
64	2017-03-06	no clear response	incomplete				lost to follow up	no phone
65	2017-04-03	no clear response	no clear response				lost to follow up	no phone

## Sheet: Group C
Infant	date of first screen	1st TEOAE right	1st TEOAE left	Date of 2nd screen	2nd TEOAE right	2nd TEOAE left	Follow up plan	notes
1	2017-01-18	incomplete	incomplete	2017-03-30	clear response	incomplete	declined further testing	unable to afford travel costs for repeat appointments
2	2017-01-04	not tested	incomplete	2017-03-07	clear response	clear response	discharge
3	2017-01-18	clear response	incomplete		clear response	clear response	discharge
4	2017-01-18	no clear response	no clear response		clear response	clear response	discharge
5	2017-01-20	no clear response	no clear response	2017-02-20	clear response	clear response	discharge
6	2017-01-25	no clear response	no clear response		clear response	clear response	discharge
7	2017-01-25	no clear response	no clear response	2017-03-23	clear response	clear response	discharge
8	2017-01-25	clear response	incomplete	2017-03-28	no clear response	no clear response	diagnostic testing	reliable ABR results at minimal levels obtained
9	2017-01-04	no clear response	no clear response	2017-03-27	no clear response	no clear response	diagnostic testing	did not attend for diagnostic testing
10	2017-01-04	incomplete	incomplete				lost to follow up	invalid phone number
11	2017-01-06	incomplete	incomplete				lost to follow up	no phone
12	2017-01-04	incomplete	incomplete				lost to follow up	no phone
13	2017-01-18	incomplete	incomplete				lost to follow up	no phone
14	2017-01-18	incomplete	incomplete				lost to follow up	invalid phone number
15	2017-01-20	incomplete	incomplete				lost to follow up	no phone
16	2017-01-25	incomplete	incomplete				lost to follow up	no phone
17	2017-01-20	incomplete	no clear response				lost to follow up	unable to contact with phone number provided
18	2017-01-18	incomplete	incomplete				lost to follow up	no phone
19	2017-01-18	clear response	incomplete				lost to follow up	unable to contact with phone number provided
20	2017-01-06	clear response	clear response				discharge
21	2017-01-20	clear response	clear response				discharge
22	2017-01-04	clear response	clear response				discharge
23	2017-01-20	clear response	clear response				discharge
24	2017-01-06	clear response	clear response				discharge
25	2017-01-20	clear response	clear response				discharge
26	2017-02-08	clear response	clear response				discharge
27	2017-01-20	clear response	clear response				discharge
28	2017-02-08	clear response	clear response				discharge
29	2017-01-25	clear response	clear response				discharge
30	2017-01-04	clear response	clear response				discharge
31	2017-01-20	clear response	clear response				discharge
32	2017-01-18	clear response	clear response				discharge
33	2017-02-08	clear response	clear response				discharge
34	2017-01-25	clear response	clear response				discharge
35	2017-02-08	clear response	clear response				discharge
36	2017-01-25	clear response	clear response				discharge
37	2017-01-20	clear response	clear response				discharge
38	2017-01-20	clear response	clear response				discharge
39	2017-01-20	clear response	clear response				discharge
40	2017-02-08	clear response	clear response				discharge
41	2017-01-25	clear response	clear response				discharge
42	2017-01-20	clear response	clear response				discharge
43	2017-01-25	clear response	clear response				discharge
44	2017-01-20	clear response	clear response				discharge
45	2017-02-08	clear response	clear response				discharge
46	2017-02-08	clear response	clear response				discharge
47	2017-01-25	clear response	clear response				discharge
48	2017-01-25	clear response	clear response				discharge
49	2017-02-08	clear response	no clear response				lost to follow up	invalid phone number
50	2017-02-08	clear response	no clear response				lost to follow up	unable to contact with phone number provided
51	2017-02-08	clear response	no clear response				lost to follow up	invalid phone number
52	2017-01-25	no clear response	clear response				lost to follow up	no phone
53	2017-01-25	no clear response	clear response				lost to follow up	no phone
54	2017-02-08	no clear response	clear response				lost to follow up	unable to contact with phone number provided
55	2017-01-18	no clear response	no clear response				lost to follow up	invalid phone number
56	2017-02-08	no clear response	no clear response				lost to follow up	no phone
57	2017-01-20	no clear response	no clear response				lost to follow up	unable to contact with phone number provided
58	2017-02-08	no clear response	no clear response				lost to follow up	unable to contact with phone number provided
59	2017-01-20	no clear response	no clear response				lost to follow up	unable to contact with phone number provided
60	2017-01-06	no clear response	no clear response				lost to follow up	unable to contact with phone number provided
61	2017-01-06	no clear response	no clear response				lost to follow up	unable to contact with phone number provided
62	2017-01-20	no clear response	no clear response				lost to follow up	no money for transport
63	2017-01-20	no clear response	no clear response				lost to follow up	unable to contact with phone number provided
64	2017-01-25	no clear response	no clear response				lost to follow up	no phone
65	2017-01-20	no clear response	no clear response				lost to follow up	unable to contact with phone number provided
